# Supplementary material for: Protein-modified silver nanoplates for the complementary analytical method of localised surface plasmon resonance and matrix assisted laser desorption/ionisation mass spectrometry
Source: Royal Society of Chemistry journal article supplement (doi:10.1039/c3ay40708j), 2013-01-01
Supplement: c3ay40708j.pdf [file c3ay40708j.pdf]

## ***Electronic Supplementary Information (ESI)***

Protein-modified silver nanoplates for complementary analytical method of localized surface plasmon resonance (LSPR) and matrix assisted laser desorption/ionization mass spectrometry (MALDI-MS)

*Masayuki Inuta, Ryuichi Arakawa, and Hideya Kawasaki\**

Department of Chemistry and Materials Engineering, Faculty of Chemistry, Materials and Bioengineering, Kansai University 3-3-35, Yamate-cho, Suita-shi, Osaka 564-8680, Japan

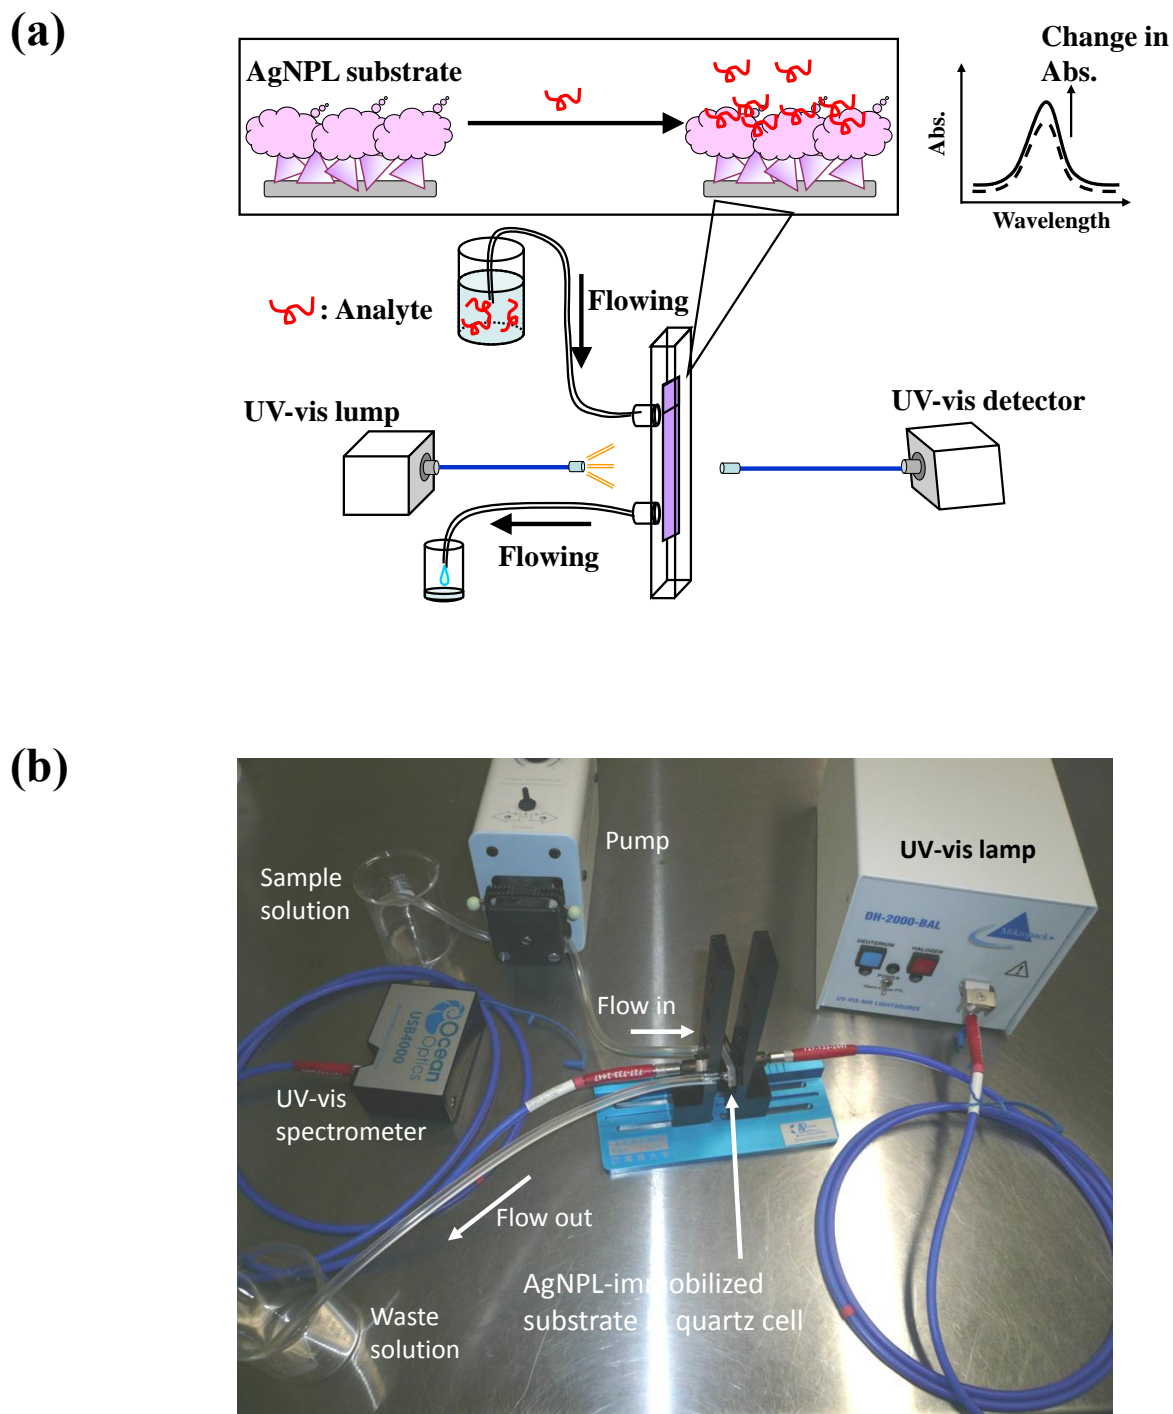

**Figure S1.** (a) Schematic and (b) photograph images of LSPR sensing system.

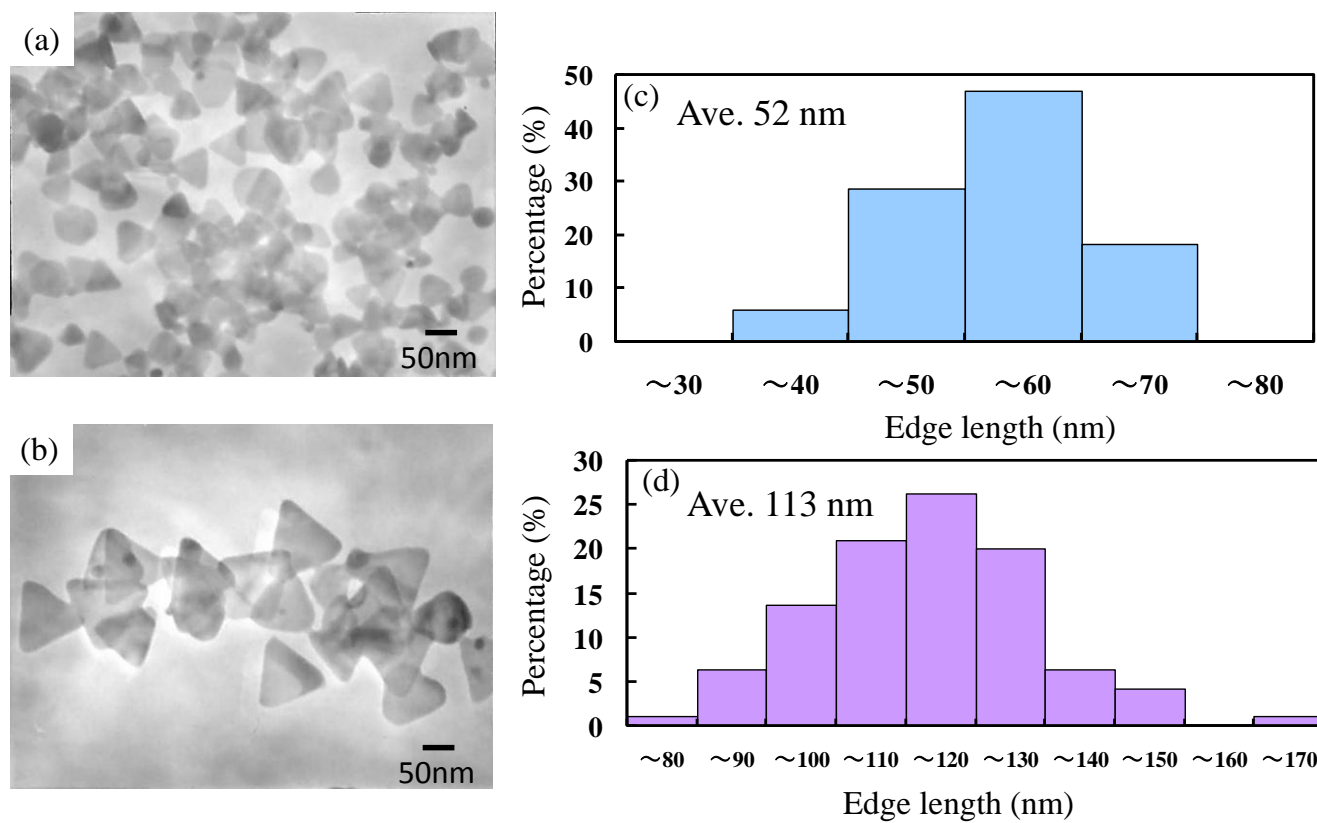

**Figure S2.** TEM images of Ag NPL at the irradiated times of (a) 4h and (b) 7h in the presence of excess  $\text{Ag}^+$  ions. The size distributions of edge lengths of Ag NPL at the irradiated times of (c) 4h and (d) 7h in the presence of excess  $\text{Ag}^+$  ions.

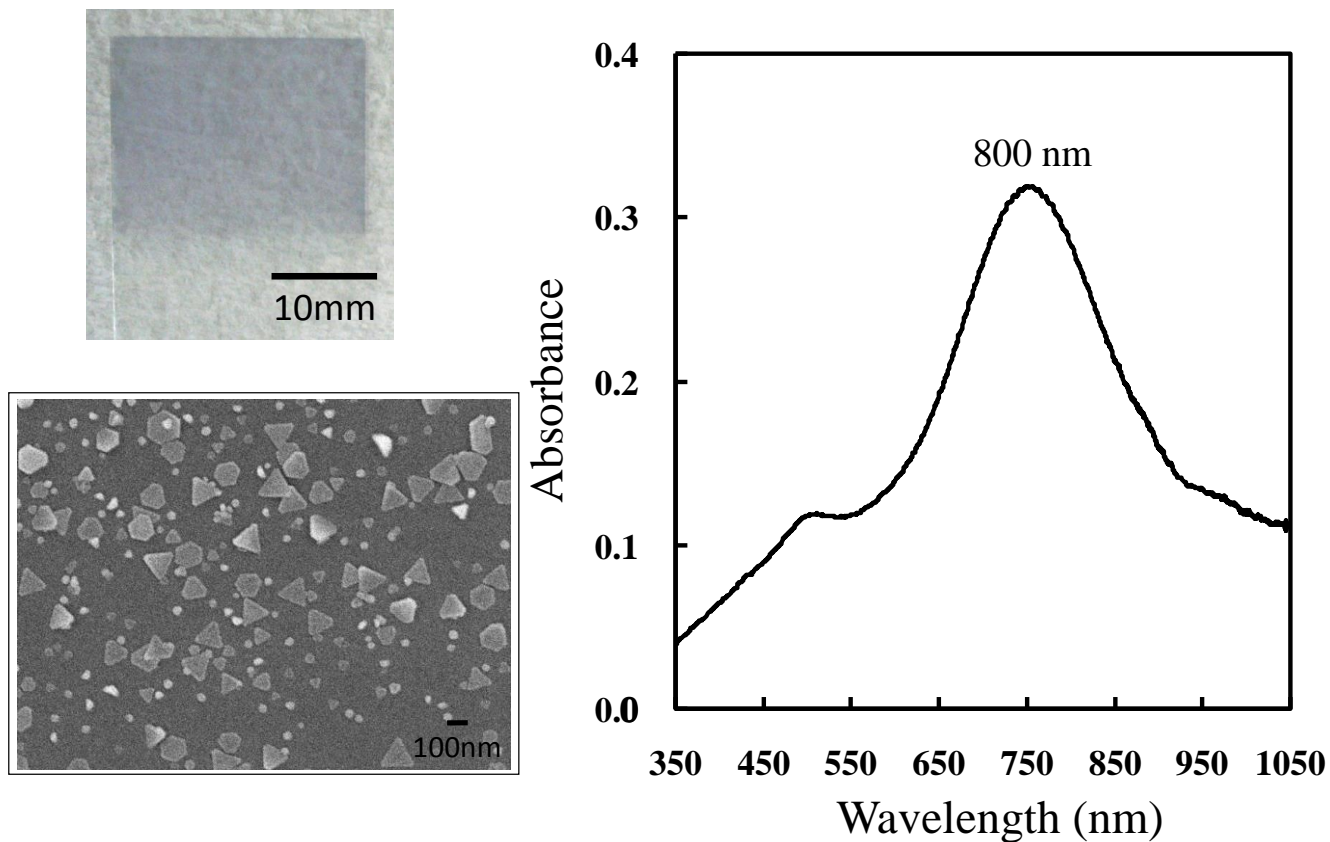

**Figure S3.** (a) Optical image, (b) SEM image and (c) UV-vis spectrum of AgNPL-immobilized substrate under air.

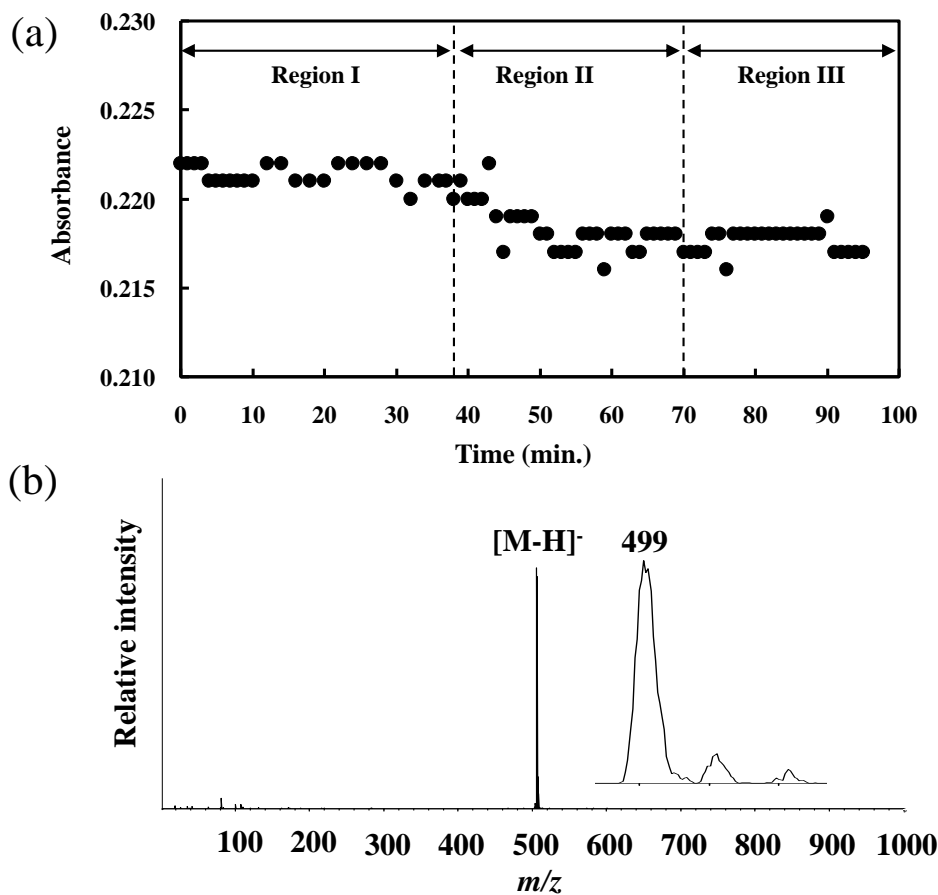

**Figure S4.** (a) LSPR absorbance changes of Lyz-Ag NPL substrate as a function of time. (b) Matrix-free LDI mass spectrum of PFOS from the Lyz-Ag NPL substrate.

Note: (a) In water (region I), no change in the absorbance can be observed. On the addition of 20  $\mu\text{M}$  PFOS solution (region II) and during the subsequent washing with water (region III), no absorbance change can be seen. (b) The matrix-free LDI-MS clearly showed the deprotonated ion peak of PFOS at  $m/z$  499 in the mass spectrum
